# Supplementary material for: Neural Underpinnings of Proactive Interference in Working Memory: Evidence From Patients With Unilateral Lesions
Source: Frontiers journal article supplement (doi:10.3389/fneur.2021.607273), 2021-02-10
Supplement: Table_1.pdf [file Table_1.pdf]

**Table S1:** Results of the linear regressions performed on the size of the interference effect per white matter tract territory (as measured by the intensity of the T2-weighted signal in the mask of interest) and including lesion size as a factor. Significant and marginal effects are in bold.

|                                                                 | <i>Fiber tract territory</i>                                                                |                                                                                                                                             |                                                                                                                                             |
|-----------------------------------------------------------------|---------------------------------------------------------------------------------------------|---------------------------------------------------------------------------------------------------------------------------------------------|---------------------------------------------------------------------------------------------------------------------------------------------|
|                                                                 | <i>Arcuate fasciculus (AF)</i>                                                              | <i>Inferior fronto-occipital fasciculus (IFOF)</i>                                                                                          | <i>Extreme/external capsule (ExC)</i>                                                                                                       |
| Intercept                                                       | $\beta = 2.63 \times 10^{-1}$<br>SE = $1.32 \times 10^{-1}$<br>t-value = 2.00<br>p = .081   | $\beta = -3.10 \times 10^{-1}$<br>SE = $1.84 \times 10^{-1}$<br>t-value = -1.69<br>p = .131                                                 | $\beta = -1.45 \times 10^{-1}$<br>SE = 8.63<br>t-value = -1.68<br>p = .132                                                                  |
| Intensity of T2-weighted signal in white matter tract territory | $\beta = -1.24 \times 10^{-1}$<br>SE = $7.93 \times 10^{-2}$<br>t-value = -1.56<br>p = .157 | <b><math>\beta = 2.52 \times 10^{-1}</math></b><br><b>SE = <math>1.13 \times 10^{-1}</math></b><br><b>t-value = 2.42</b><br><b>p = .055</b> | <b><math>\beta = 1.59 \times 10^{-1}</math></b><br><b>SE = <math>5.03 \times 10^{-2}</math></b><br><b>t-value = 3.16</b><br><b>p = .013</b> |
| Lesion size                                                     | $\beta = 3.55 \times 10^{-5}$<br>SE = $6.76 \times 10^{-5}$<br>t-value = 0.56<br>p = .614   | $\beta = 1.52 \times 10^{-5}$<br>SE = $5.85 \times 10^{-5}$<br>t-value = 0.26<br>p = .801                                                   | $\beta = -4.56 \times 10^{-5}$<br>SE = $5.25 \times 10^{-5}$<br>t-value = -0.87<br>p = .410                                                 |
